# Supplementary material for: Salmonella Typhi Colonization Provokes Extensive Transcriptional Changes Aimed at Evading Host Mucosal Immune Defense During Early Infection of Human Intestinal Tissue
Source: PubMed Central journal article supplement — eBioMedicine. 2018 Apr 12;31:92–109. doi: 10.1016/j.ebiom.2018.04.005 (PMC6013756; doi:10.1016/j.ebiom.2018.04.005), 2018-04-12
Supplement: mmc1.pdf [file mmc1.pdf]

# BACTERIAL SECRETION SYSTEM

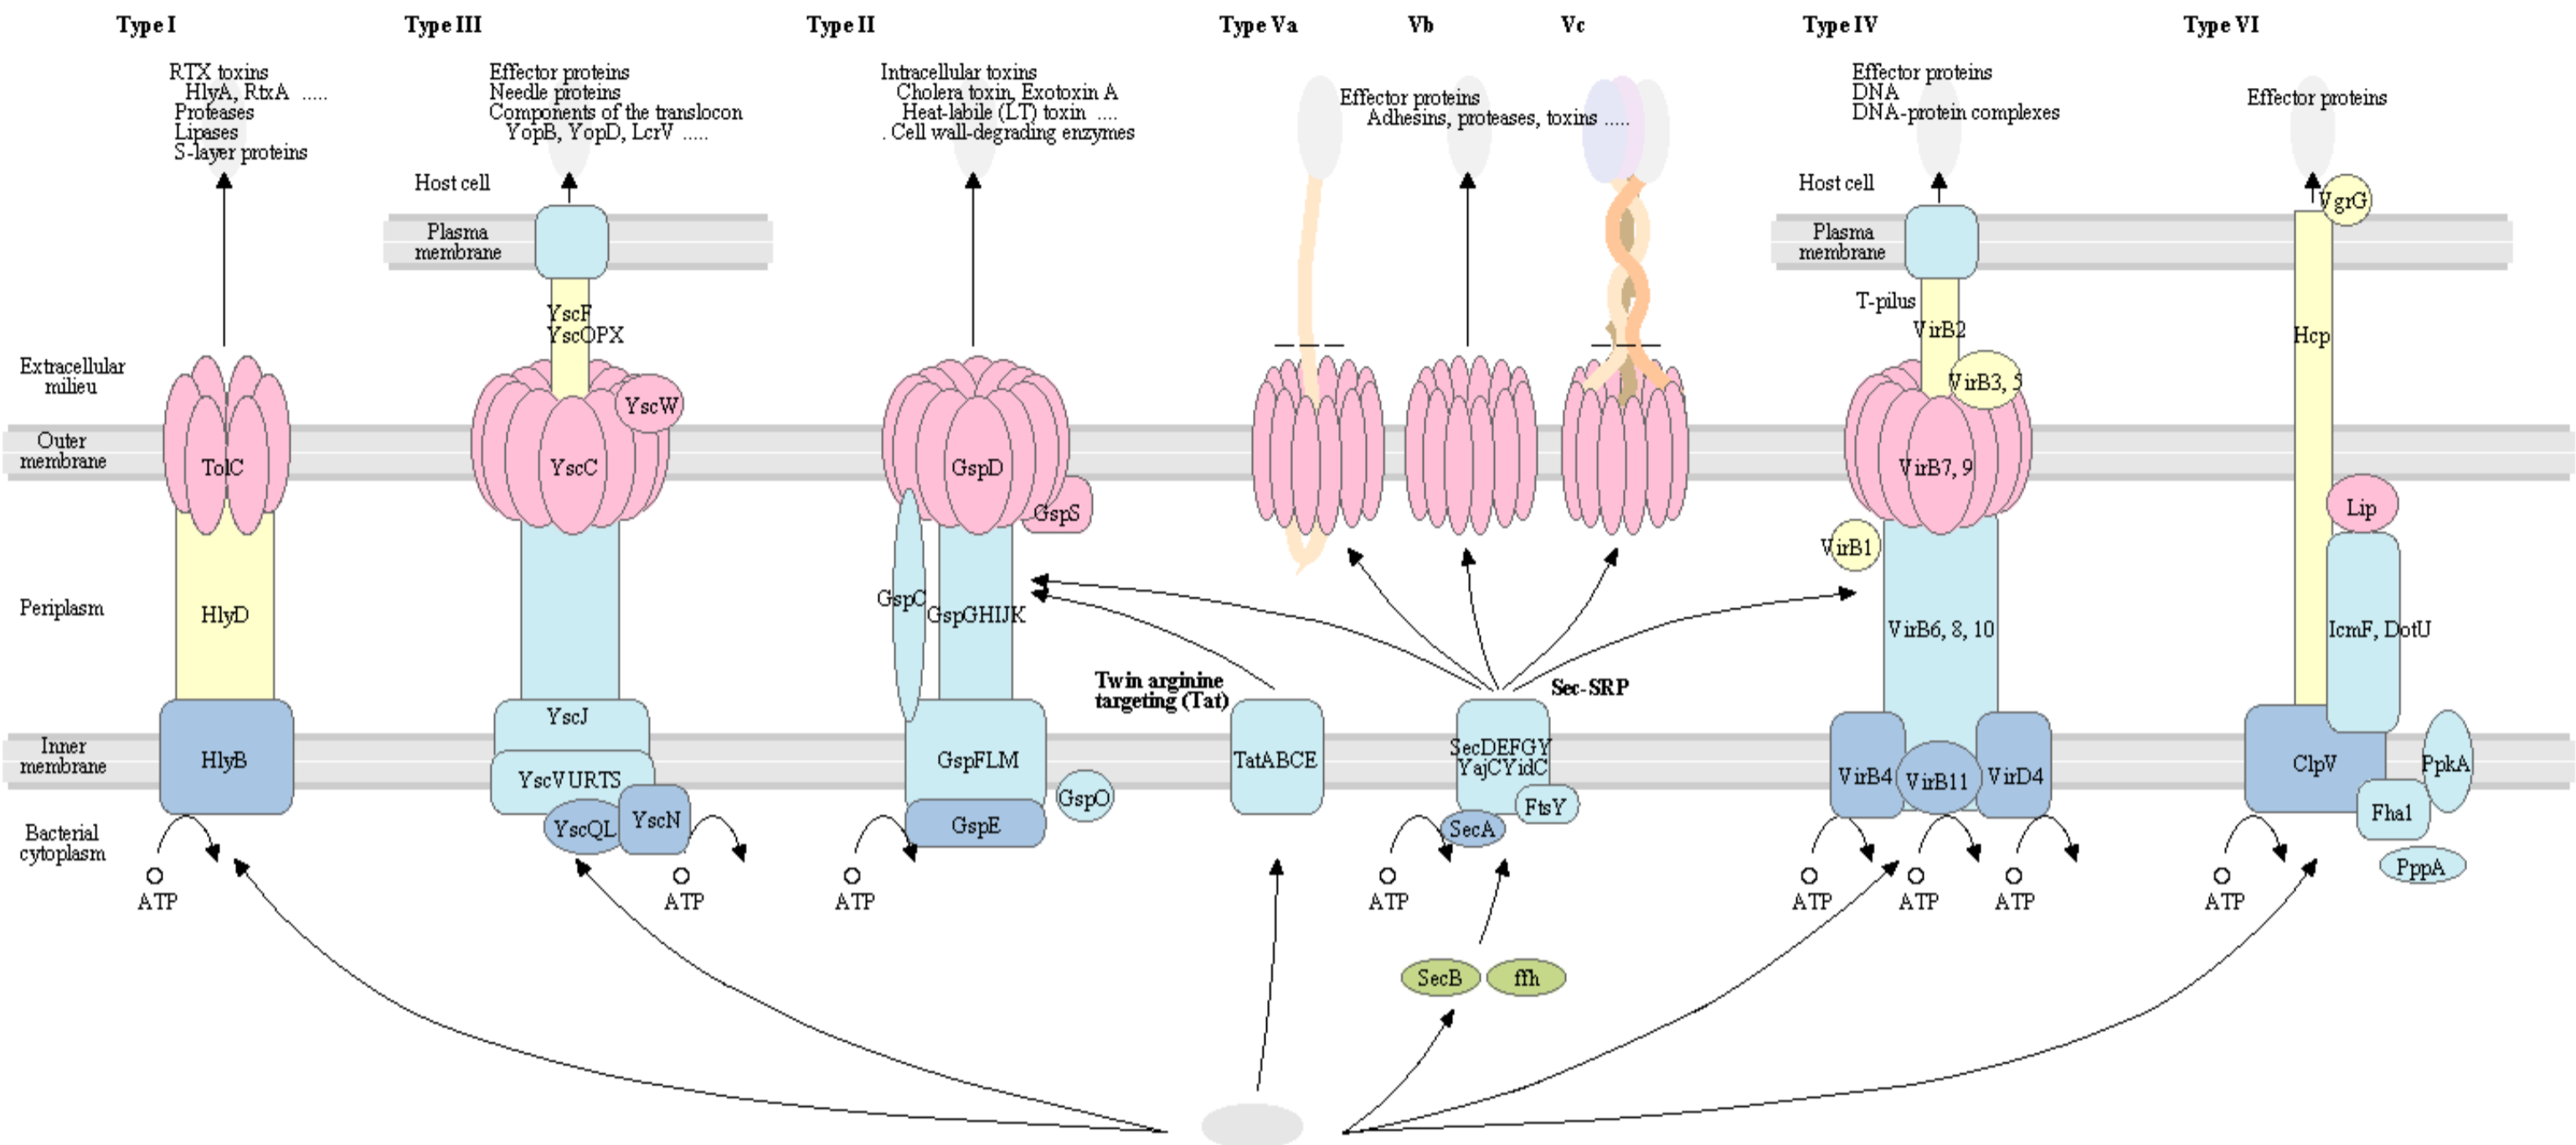

|                              |                           |
|------------------------------|---------------------------|
| <b>Type I</b>                | <b>Type III</b>           |
| Outer membrane protein (OMP) | Needle                    |
| TolC                         | YscF                      |
| Membrane fusion protein      | YscO YscP YscX            |
| HlyD                         | Secretin                  |
| ABC transporter              | YscC                      |
| HlyB                         | OMP                       |
|                              | YscW                      |
| Inner membrane protein (IMP) | YscJ YscR YscS            |
|                              | YscT YscU YscV            |
|                              | ATPase                    |
|                              | YscN                      |
|                              | ATPase-associated protein |
|                              | YscQ YscL                 |

|                 |
|-----------------|
| <b>Type II</b>  |
| Secretin        |
| GspD            |
| OMP             |
| GspS            |
| IMP             |
| GspC GspF GspG  |
| GspH GspI GspJ  |
| GspK GspL GspM  |
| ATPase          |
| GspE            |
| Leaderpeptidase |
| GspO            |

|                   |
|-------------------|
| <b>Sec-SRP</b>    |
| IMP               |
| SecD/F SecE SecG  |
| SecY YajC YidC    |
| ATPase            |
| SecA              |
| Secretion monitor |
| SecM              |
| SRP receptor      |
| FtsY              |
| Targeting protein |
| SecB ffh          |

|                                      |
|--------------------------------------|
| <b>Type Va Vb Vc</b>                 |
| OMP                                  |
| VacA ShlB YadA                       |
| ShlA YadB/C                          |
| <b>Twin arginine targeting (Tat)</b> |
| IMP                                  |
| TatA TatB TatC TatE                  |

|                       |
|-----------------------|
| <b>Type IV</b>        |
| Periplasmic protein   |
| VirB1                 |
| Surface/pilus protein |
| VirB2 VirB3 VirB5     |
| OMP                   |
| VirB7 VirB9           |
| IMP                   |
| VirB6 VirB8 VirB10    |
| ATPase                |
| VirB4 VirB11 VirD4    |

|                    |
|--------------------|
| <b>Type VI</b>     |
| Secreted substrate |
| VgrG               |
| Hcp                |
| OMP                |
| Lip                |
| IMP                |
| IcmF DotU          |
| ATPase             |
| ClpV               |
| Regulatory protein |
| PpkA Fha1 PppA     |

03070 4/12/10  
(c) Kanehisa Laboratories

Upregulated  
-Lime Green

Downregulated  
-Single copy (Pink)  
-Both copies (red)

Genes in the Salmonella Genome  
-Mint Green

Genes not in the Salmonella genome (but found commonly in other bacterial export pathways)  
-White
